# Supplementary material for: LncRNA DANCR upregulates PI3K/AKT signaling through activating serine phosphorylation of RXRA
Source: PubMed Central journal article supplement (PMC6281578; doi:10.1038/s41419-018-1220-7), 2018-12-05
Supplement: 41419_2018_1220_MOESM1_ESM.pdf [file 41419_2018_1220_MOESM1_ESM.pdf]

**A**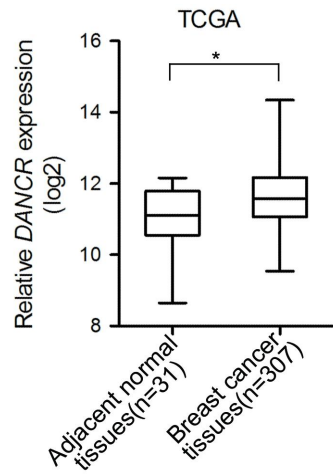**B**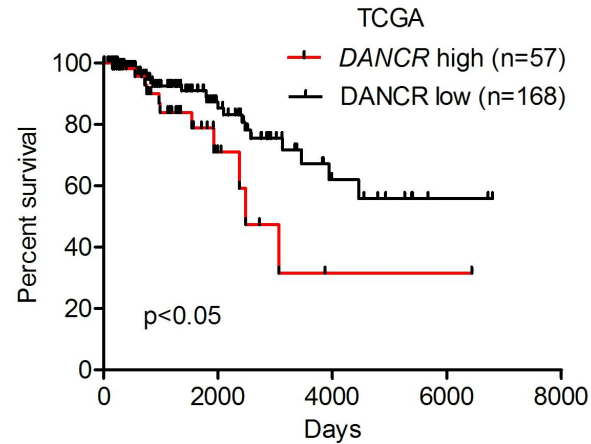**C**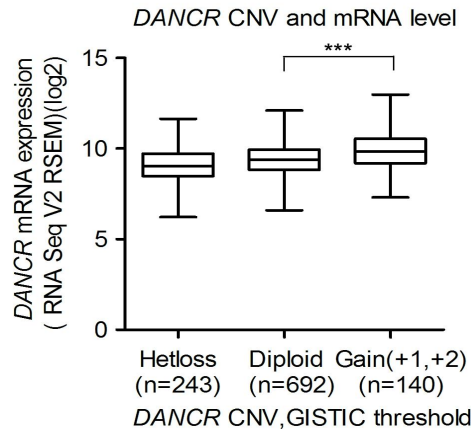

### Supplementary Figure 1 Expression of *DANCR* in clinical breast cancer specimens

(A) *DANCR* mRNA expression levels are markedly higher in clinical breast cancer samples as compared to adjacent normal tissues. Data of *DANCR* mRNA expression were downloaded from the Cancer Genome Atlas (TCGA) microarray dataset. (B) Kaplan–Meier analysis of patients with high *DANCR* mRNA-expressing breast cancer versus low *DANCR* mRNA-expressing breast cancer from the TCGA microarray dataset. Statistical analysis was performed by log-rank test in a GraphPad Prism version 5.0 for Windows. (C) *DANCR* mRNA expression levels were markedly higher in samples with *DANCR* gained CNA compared with the samples without CNV in the TCGA dataset. Error bars  $\pm$  SD. \*, P < 0.05. \*\*\* P < 0.001. Data are representative from two independent experiments.
