# Supplementary material for: LncRNA DANCR upregulates PI3K/AKT signaling through activating serine phosphorylation of RXRA
Source: PubMed Central journal article supplement (PMC6281578; doi:10.1038/s41419-018-1220-7), 2018-12-05
Supplement: 41419_2018_1220_MOESM3_ESM.pdf [file 41419_2018_1220_MOESM3_ESM.pdf]

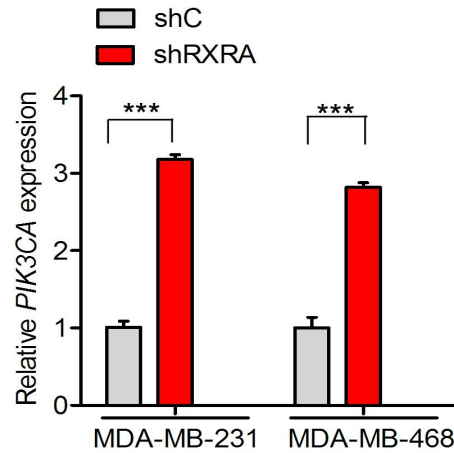

**Supplementary Figure 3 RXRA regulates PIK3CA transcription**

(A) Knockdown of RXRA increased PIK3CA mRNA in MDA-MB-231 and MDA-MB-468 cells. Error bars  $\pm$  SD. \*\*\*  $P < 0.001$ . Data are representative from two independent experiments.
